# Supplementary material for: Fabrication and Characterization of Humidity Sensors Based on Graphene Oxide–PEDOT:PSS Composites on a Flexible Substrate
Source: PubMed Central journal article supplement (PMC7074611; doi:10.3390/mi11020148), 2020-01-29
Supplement: micromachines-11-00148-s001.pdf [file micromachines-11-00148-s001.pdf]

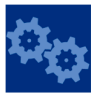

# Supplementary Material: Fabrication and Characterization of Humidity Sensors based on Graphene Oxide–PEDOT:PSS Composites on a Flexible Substrate

Francisco J. Romero, Almudena Rivadeneyra, Markus Becherer, Diego P. Morales and Noel Rodríguez

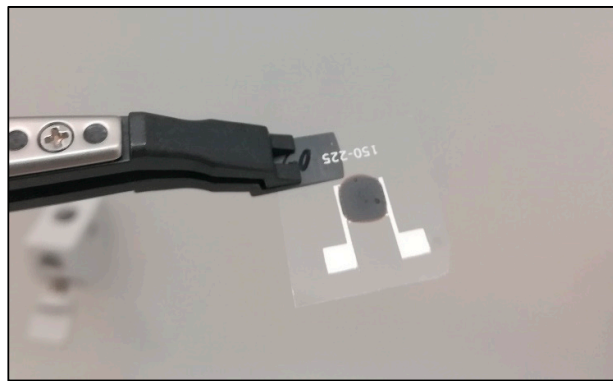

Figure S1. Actual view of one of the flexible RH sensors presented in this work.

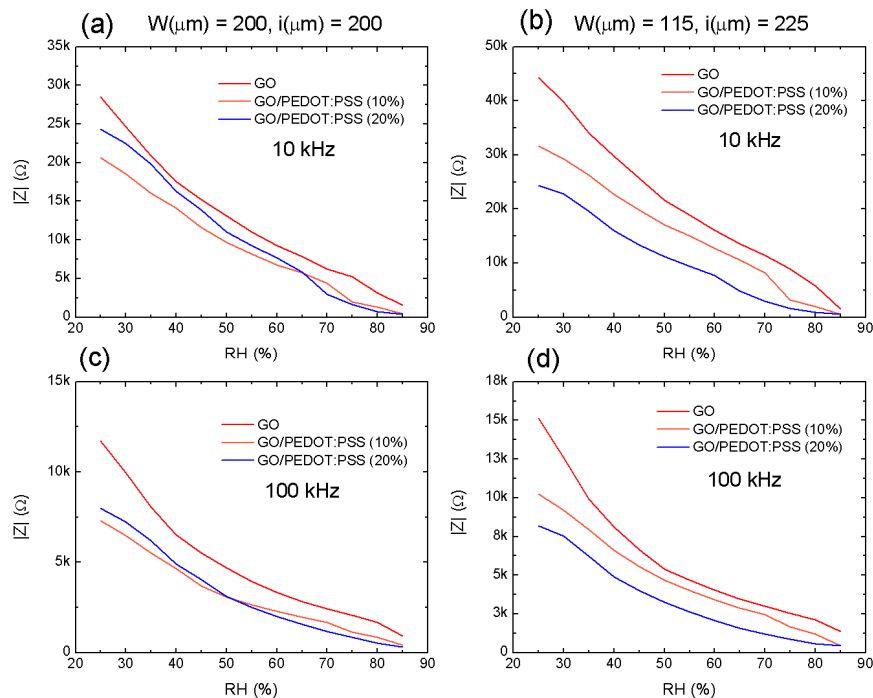

Figure S2. Absolute value of the impedance as a function of the relative humidity measured at different frequencies for both layout 1 (10 kHz (a) and 100 kHz (c)) and layout 2 (10 kHz (b) and 100 kHz (d)) using GO and the hybrid GO/PEDOT:PSS composites as sensitive layers.

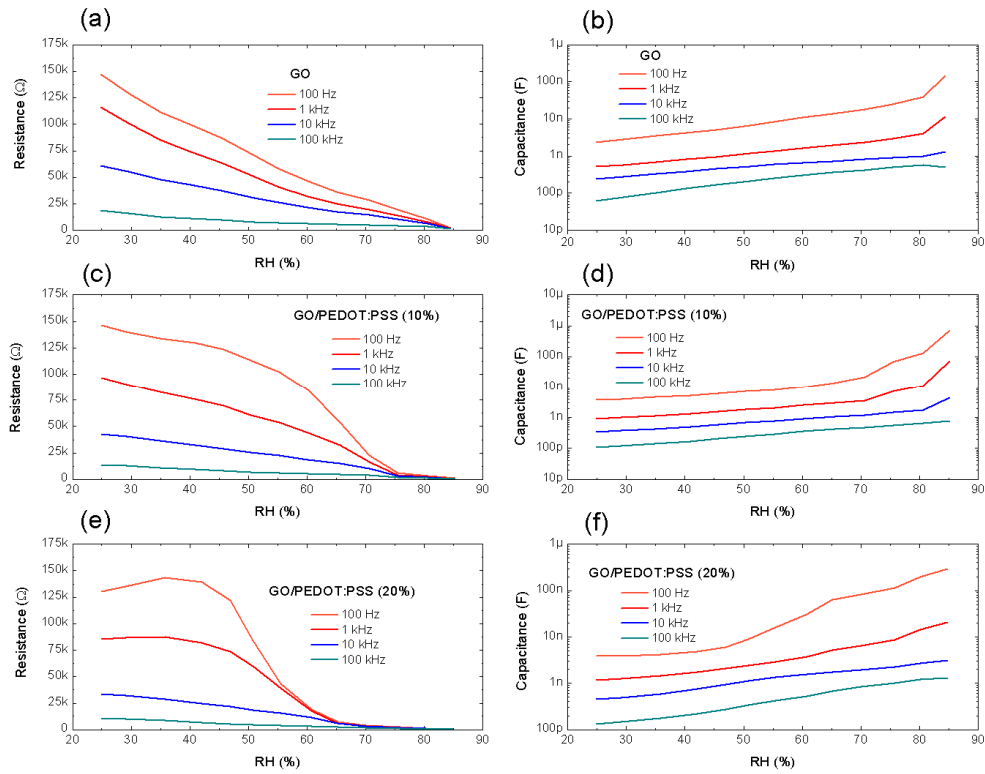

**Figure S3.** Equivalent parallel resistance and capacitance for layout 2 ( $W = 115 \mu\text{m}$ ,  $i = 225 \mu\text{m}$ ) at different frequencies using GO and the hybrid GO/PEDOT:PSS composites as sensitive layers; being (a) and (b) the results obtained for the GO layer, while (c)–(d) and (e)–(f) are the results associated to the GO/PEDOT:PSS (10%) and GO/PEDOT:PSS (20%) layers, respectively.

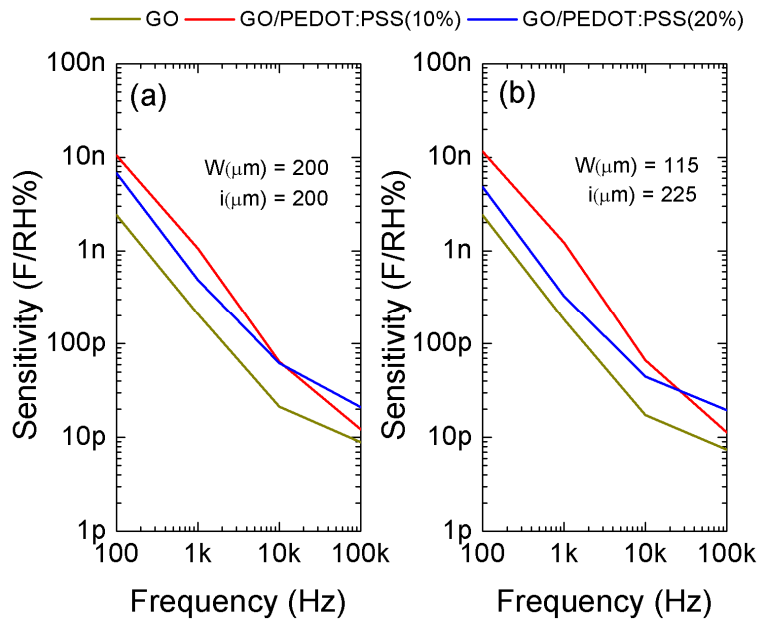

**Figure S4.** Sensitivity as a function of the frequency for the two layouts considered in this work ((a) layout 1, (b) layout 2), as well as the three different sensitive layer.
